# Supplementary material for: Ammine bimetallic (Na, Zn) borohydride for advanced chemical hydrogen storage
Source: Royal Society of Chemistry journal article supplement (doi:10.1039/c2jm16370e), 2012-01-01
Supplement: c2jm16370e.pdf [file c2jm16370e.pdf]

## Supporting Information

### **Ammine Bimetallic (Na, Zn) Borohydride for Advanced Chemical Hydrogen Storage**

Guanglin Xia,<sup>a</sup> Qinfen Gu,<sup>b</sup> Yanhui Guo,<sup>a</sup> Xuebin Yu\*<sup>a</sup>

<sup>a</sup> *Department of Materials Science, Fudan University, Shanghai 200433, China.*

<sup>b</sup> *Australian Synchrotron, 800 Blackburn Rd, Clayton 3168, Australia*

**Table S1.** Experimental structural parameters of the as-prepared  $\text{NaZn}(\text{BH}_4)_3 \cdot 2\text{NH}_3$ .

| Atom | Site | x/a         | y/b         | z/c         |
|------|------|-------------|-------------|-------------|
| Zn1  | 4a   | 0.69084(43) | 0.24742(24) | 0.41352(13) |
| Na1  | 4a   | 0.77549(77) | 0.04133(50) | 0.84756(32) |
| B1   | 4a   | 0.17713     | 0.65232     | 0.89356     |
| H1a  | 4a   | 0.21145     | 0.74453     | 0.93845     |
| H1b  | 4a   | 0.23517     | 0.56537     | 0.93713     |
| H1c  | 4a   | 0.02312     | 0.64791     | 0.88505     |
| H1d  | 4a   | 0.24181     | 0.65716     | 0.81450     |
| B2   | 4a   | 0.22393     | 0.30326     | 0.07086     |
| H2a  | 4a   | 0.22247     | 0.34961     | 0.15007     |
| H2b  | 4a   | 0.27619     | 0.37956     | 0.01460     |
| H2c  | 4a   | 0.31367     | 0.21262     | 0.07474     |
| H2d  | 4a   | 0.08033     | 0.27309     | 0.04832     |
| B3   | 4a   | 0.44443     | 0.70997     | 0.17091     |
| H3a  | 4a   | 0.53779     | 0.62110     | 0.17035     |
| H3b  | 4a   | 0.40833     | 0.73384     | 0.08828     |
| H3c  | 4a   | 0.32071     | 0.68461     | 0.21941     |
| H3d  | 4a   | 0.51782     | 0.79684     | 0.20654     |
| N5   | 4a   | 0.21841     | 0.05904     | 0.89697     |
| H5a  | 4a   | 0.10116     | 0.02214     | 0.92232     |
| H5b  | 4a   | 0.24492     | 0.02341     | 0.82749     |
| H5c  | 4a   | 0.31846     | 0.03431     | 0.94476     |
| N6   | 4a   | 0.92192     | 0.17945     | 0.36130     |
| H6a  | 4a   | 1.00606     | 0.19851     | 0.41929     |
| H6b  | 4a   | 0.91471     | 0.08298     | 0.35053     |
| H6c  | 4a   | 0.96845     | 0.22215     | 0.29786     |

**Table S2.** Interatomic bond distances (Å) in the crystal structure of  $\text{NaZn}(\text{BH}_4)_3 \cdot 2\text{NH}_3$ .

| Atoms |     | Bond distances (Å) | Atoms |        | Bond distances (Å) |
|-------|-----|--------------------|-------|--------|--------------------|
| Zn1   | H3a | 1.8113             | B1    | H1c    | 1.2095             |
|       | H2d | 1.8566             |       | H1b    | 1.2225             |
|       | H3d | 2.0876             |       | H1a    | 1.2475             |
|       | H2b | 2.1572             |       | H1d    | 1.2671             |
|       | H6b | 2.4006             | B2    | H2b    | 1.2061             |
|       | H5b | 2.4031             |       | H2a    | 1.2199             |
|       | H2c | 2.4254             |       | H2c    | 1.2388             |
|       | H6a | 2.5378             |       | H2d    | 1.2561             |
|       | H5c | 2.5584             | B3    | H3d    | 1.2125             |
|       | B2  | 2.1185             |       | H3c    | 1.2199             |
|       | B3  | 2.1392             |       | H3a    | 1.2332             |
|       | N6  | 1.9435             |       | H3b    | 1.2335             |
|       | N5  | 1.9853             | N5    | H5c    | 1.0338             |
|       |     |                    |       | H5a    | 1.0404             |
|       |     | H5b                |       | 1.0487 |                    |
|       |     | N6                 | H6c   | 1.0339 |                    |
|       |     |                    | H6b   | 1.0428 |                    |
|       |     |                    | H6a   | 1.0430 |                    |

**Table S3.** Interatomic distances (Å) and Angles (°) for apparent dihydrogen bonds in the NaZn(BH<sub>4</sub>)<sub>3</sub>·2NH<sub>3</sub>.

| Distance  |       | Angle        |        | Angle        |        |
|-----------|-------|--------------|--------|--------------|--------|
| H1b···H6a | 1.987 | B1-H1b···H6a | 113.14 | H1b···H6a-N6 | 160.16 |
| H1d···H6b | 2.053 | B1-H1d···H6b | 119.01 | H1d···H6b-N6 | 172.82 |
| H1a···H5a | 2.132 | B1-H1a···H5a | 165.91 | H1a···H5a-N5 | 128.25 |
| H1d···H5b | 2.147 | B1-H1d···H5b | 116.29 | H1d···H5b-N5 | 158.58 |
| H3d···H5b | 2.201 | B3-H3d···H5b | 137.81 | H3d···H5b-N5 | 95.19  |
| H3b···H6a | 2.352 | B3-H3b···H6a | 129.41 | H3b···H6a-N6 | 122.28 |

**Table S4.** Summarization of dehydrogenation peak temperature ( $D_p$ ), Pauling electronegativity ( $\chi_p$ ), and selected atomic distances from  $\text{NaZn}(\text{BH}_4)_3 \cdot 2\text{NH}_3$ ,  $\text{NaZn}(\text{BH}_4)_3$ , and several borohydride ammonites. All units are measured in Å.

| Samples    | $\text{NaZn}(\text{BH}_4)_3(\text{NH}_3)_2$ | $\text{NaZn}(\text{BH}_4)_3$ [S1]      | $\text{Li}(\text{BH}_4)(\text{NH}_3)$ [S2] | $\text{Mg}(\text{BH}_4)_2(\text{NH}_3)_2$ [S3] | $\text{Ca}(\text{BH}_4)_2(\text{NH}_3)_2$ [S4] | $\text{Li}_2\text{Al}(\text{BH}_4)_5(\text{NH}_3)_6$ [S5] |
|------------|---------------------------------------------|----------------------------------------|--------------------------------------------|------------------------------------------------|------------------------------------------------|-----------------------------------------------------------|
| $\chi_p$   | Zn: 1.65<br>Na: 0.93                        | Zn: 1.65<br>Na: 0.93                   | Li: 1.0                                    | Mg: 1.31                                       | Ca: 1.0                                        | Al: 1.61<br>Li: 1.0                                       |
| $D_p$ (°C) | 130                                         | 140                                    | ~280                                       | ~200                                           | ~280                                           | 138                                                       |
| Metal-H    | Zn-H<br>1.81-2.56<br>Na-H<br>2.11-2.84      | Zn-H<br>1.59-2.86<br>Na-H<br>2.26-2.85 | 1.96-2.73                                  | 2.02-2.66                                      | 2.41-2.98                                      | Al-H<br>2.57-2.73<br>Li-H<br>2.06-2.94                    |
| Metal-B    | Zn-B<br>2.11-2.14                           | Zn-B<br>2.44-2.86                      | 2.52-2.56                                  | 2.26-2.39                                      | 2.77-2.96                                      | Al-B<br>4.56-6.3                                          |
| Metal-N    | Zn-N<br>1.94-1.99                           | ---                                    | 2.01                                       | 2.14                                           | 2.52                                           | Al-N<br>2.05                                              |
| H...H      | 1.99-2.35                                   | ---                                    | 1.91-2.55                                  | 2.08-2.23                                      | 2.03-2.44                                      | 2.06-2.26                                                 |

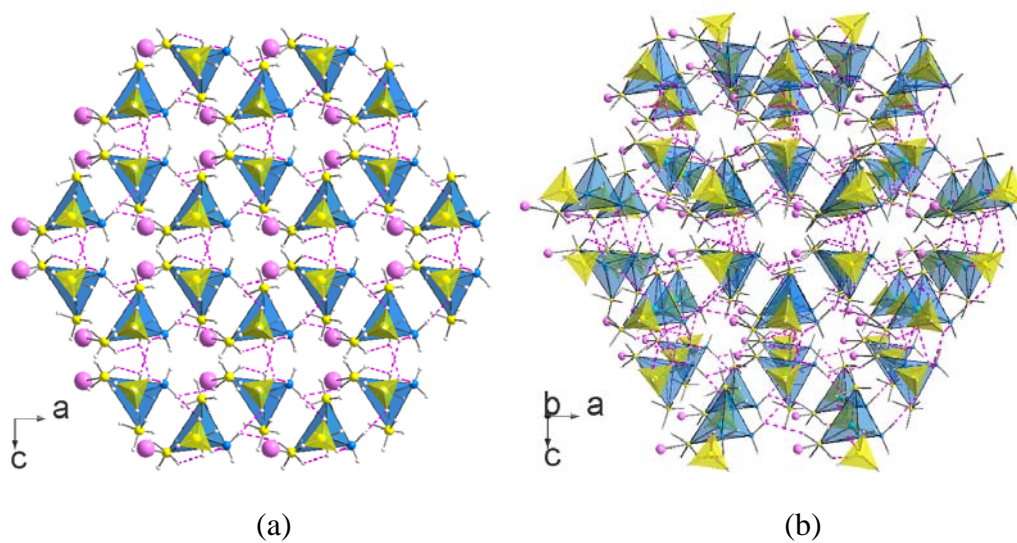

**Figure S1.** The packed architecture viewing of  $\text{NaZn}(\text{BH}_4)_3 \cdot 2\text{NH}_3$  from  $b$  direction.

The dash lines represent the dihydrogen bindings between  $\text{NH}_3$  and  $\text{BH}_4$  units.

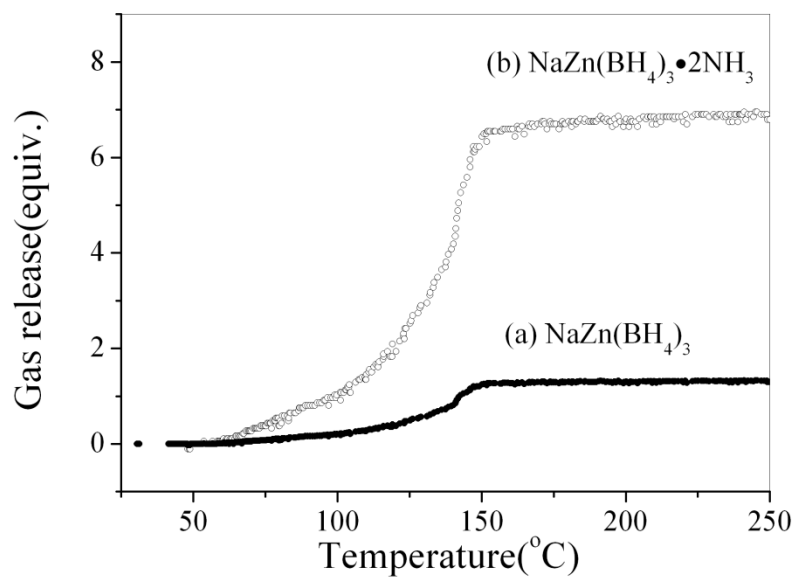

**Figure S2.** The gas release curves as a function of temperature for the synthesized NaZn(BH<sub>4</sub>)<sub>3</sub> and NaZn(BH<sub>4</sub>)<sub>3</sub>·2NH<sub>3</sub> in 1 atm Ar atmosphere. The heating ramp is 10 °C/min.

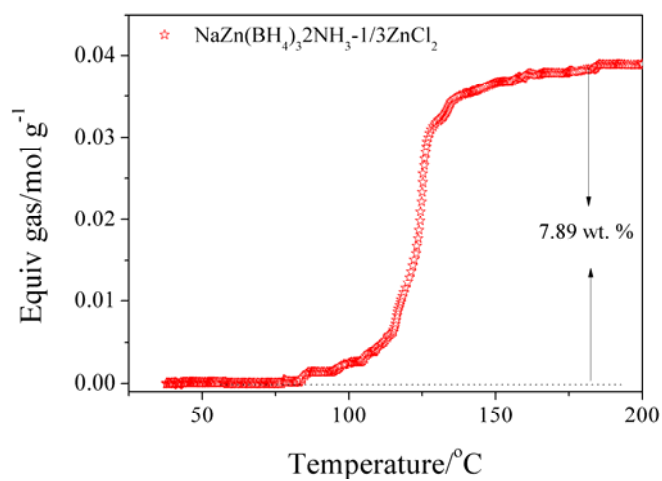

**Figure S3.** Volumetric gas release measurement for the as-prepared  $\text{NaZn}(\text{BH}_4)_3 \cdot 2\text{NH}_3 \cdot 1/3\text{ZnCl}_2$ . The heating rate is 10  $^\circ\text{C}/\text{min}$  in argon.



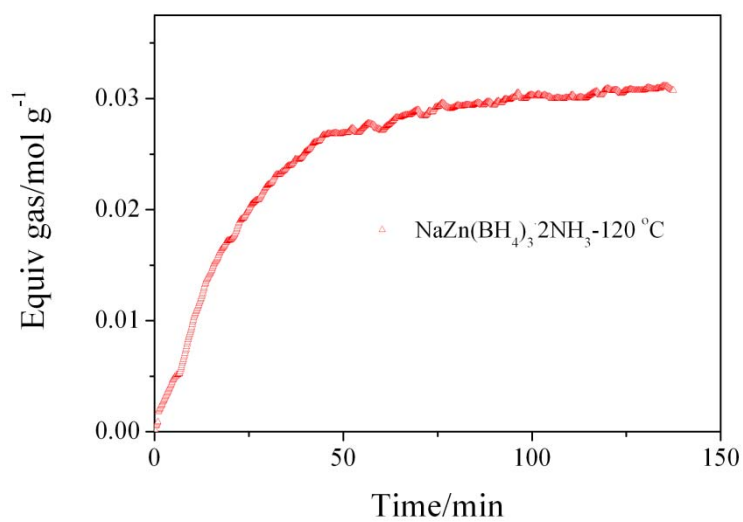

**Figure S4.** Isothermal TPD curve for the decomposition of NaZn(BH<sub>4</sub>)<sub>3</sub>·2NH<sub>3</sub> at 120 °C.

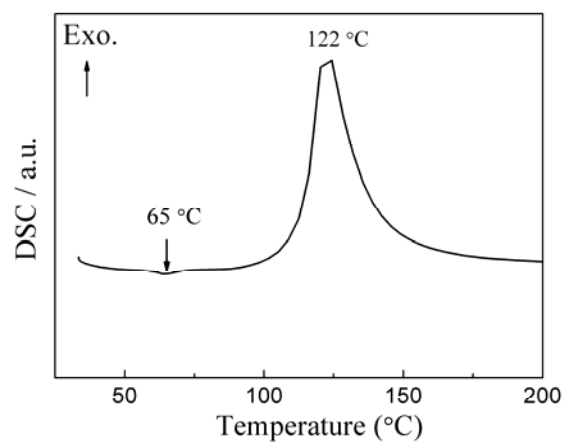

**Figure S5.** DSC curve for the as-prepared  $\text{NaZn}(\text{BH}_4)_3 \cdot 2\text{NH}_3 \cdot 1/3\text{ZnCl}_2$  composite. The heating rate is  $10\text{ }^\circ\text{C min}^{-1}$ .

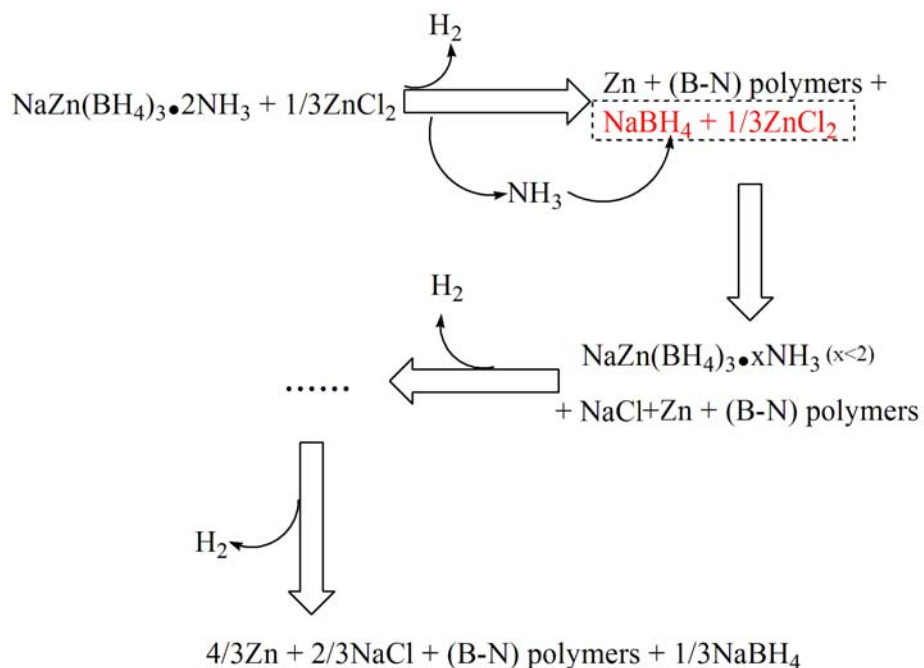

**Scheme S1.** Proposed mechanism for the dehydrogenation of the as-prepared  $\text{NaZn}(\text{BH}_4)_3 \cdot 2\text{NH}_3 - 1/3\text{ZnCl}_2$  sample. Note:  $\text{NaZn}(\text{BH}_4)_3 \cdot x\text{NH}_3$  was designated as ammoniates of  $\text{NaZn}(\text{BH}_4)_3$  with coordination number  $x < 2$ .
